# Supplementary material
Source: MDPI journal article supplement (https://www.mdpi.com/2304-6740/6/3/69)
Supplement: s1 [file s1]

Supporting Information  
for  
**One-pot Synthesis of Heavier Group 14 *N*-Heterocyclic  
Carbene using Organosilicon Reductant**

Ravindra K. Raut, Sheikh Farhan Amin, Padmini Sahoo, Vikas Kumar and  
Moumita Majumdar\*

**Contents**

|                         |     |
|-------------------------|-----|
| 1. Plots of NMR Spectra | S2  |
| 2. X-ray Data           | S15 |
| 3. Molecular Structure  | S17 |

Department of Chemistry,  
Indian Institute of Science, Education and Research, Pune  
Pune-411008, Maharashtra India  
E-mail: [moumitam@iiserpune.ac.in](mailto:moumitam@iiserpune.ac.in)

## 1. Plots of NMR Spectra

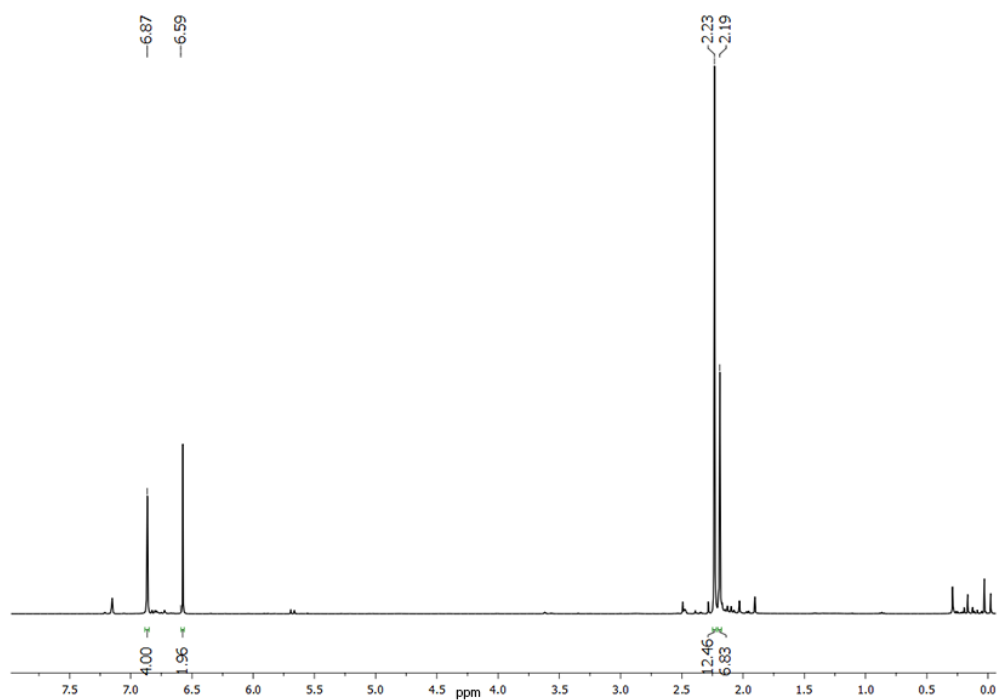

**Figure S1.** <sup>1</sup>H NMR of Compound 1 (crude reaction mixture, before crystallization)

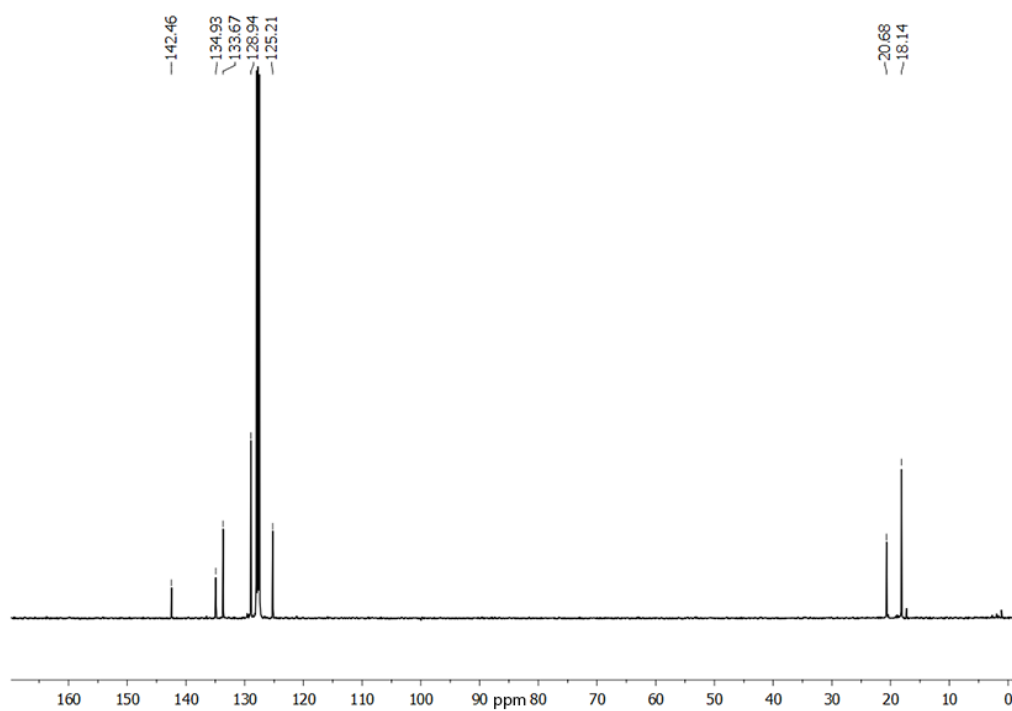

**Figure S2.** <sup>13</sup>C NMR of Compound 1 (crude reaction mixture, before crystallization)

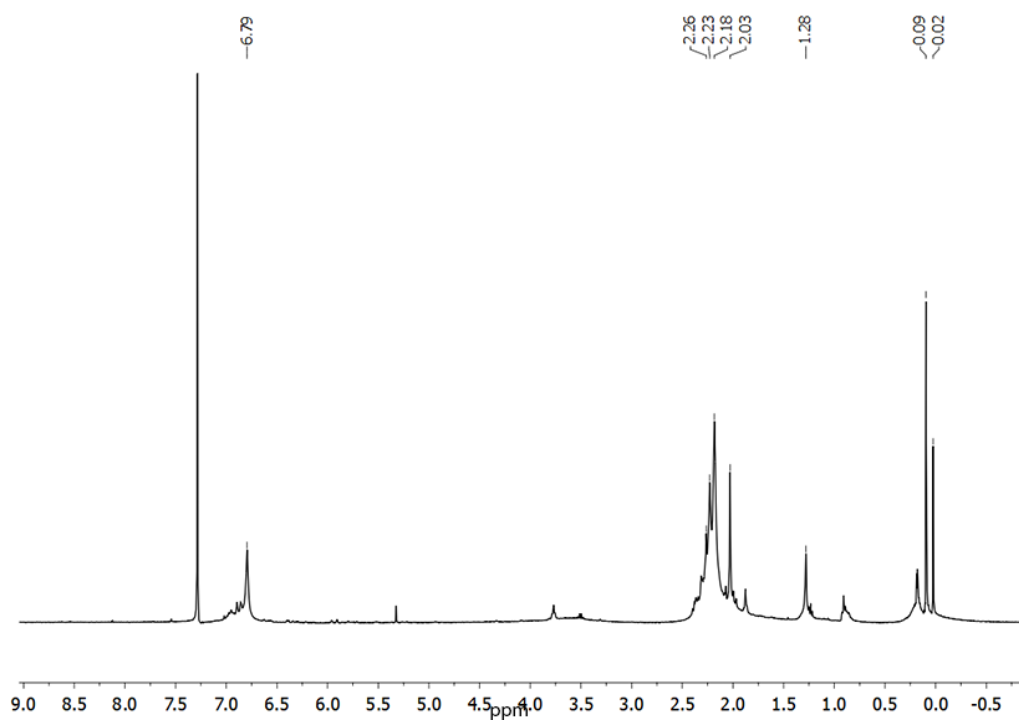

**Figure S3.**  $^1\text{H}$  NMR in  $\text{CDCl}_3$  of the hexane insoluble solid residue from the crude reaction mixture of compound 1

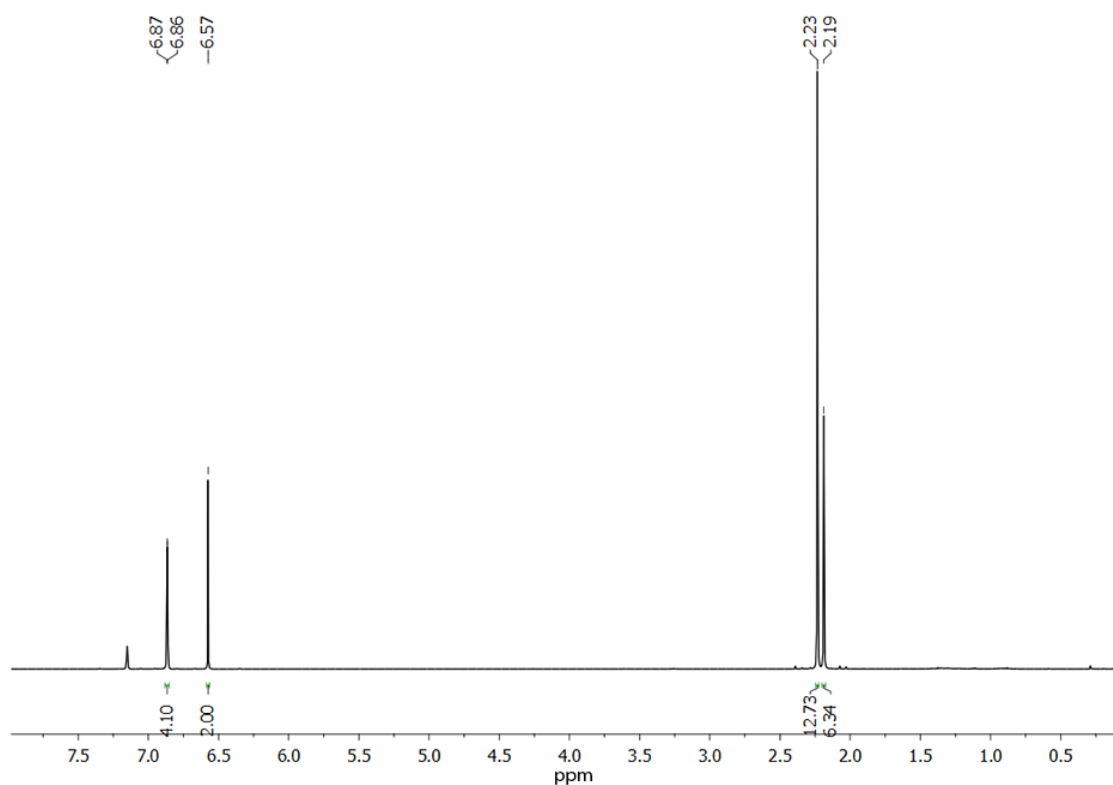

**Figure S4.**  $^1\text{H}$  NMR of Compound 1

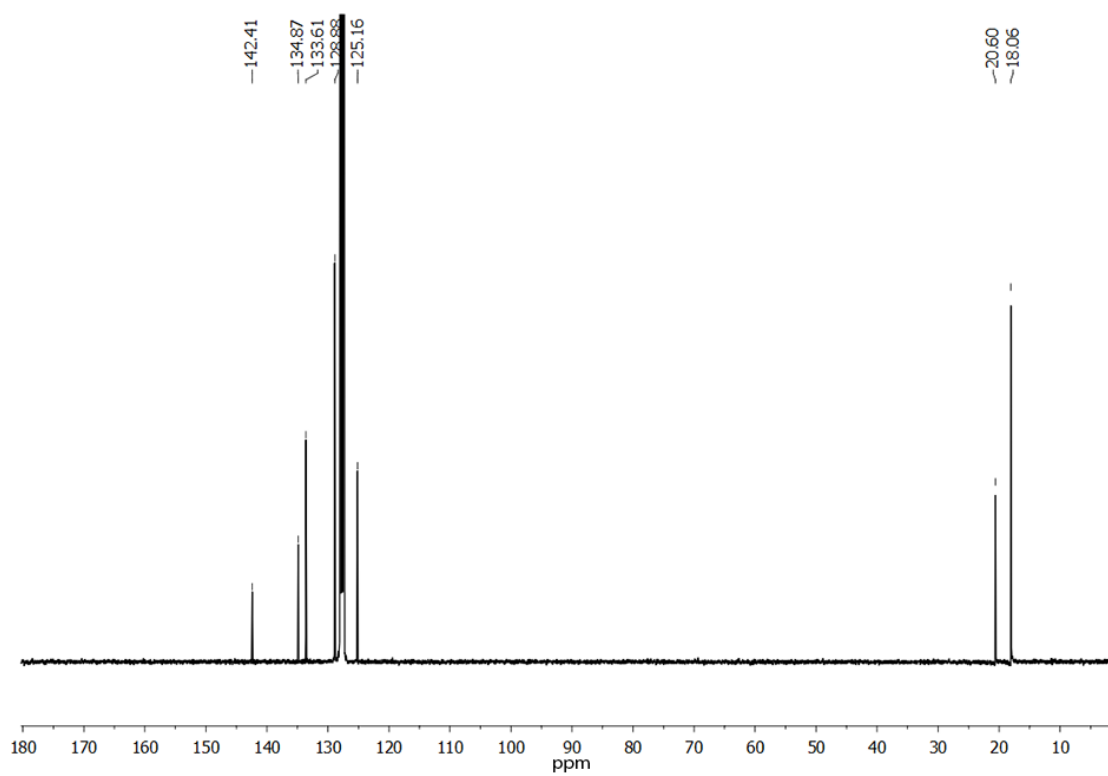

**Figure S5.**  $^{13}\text{C}$  NMR of Compound 1

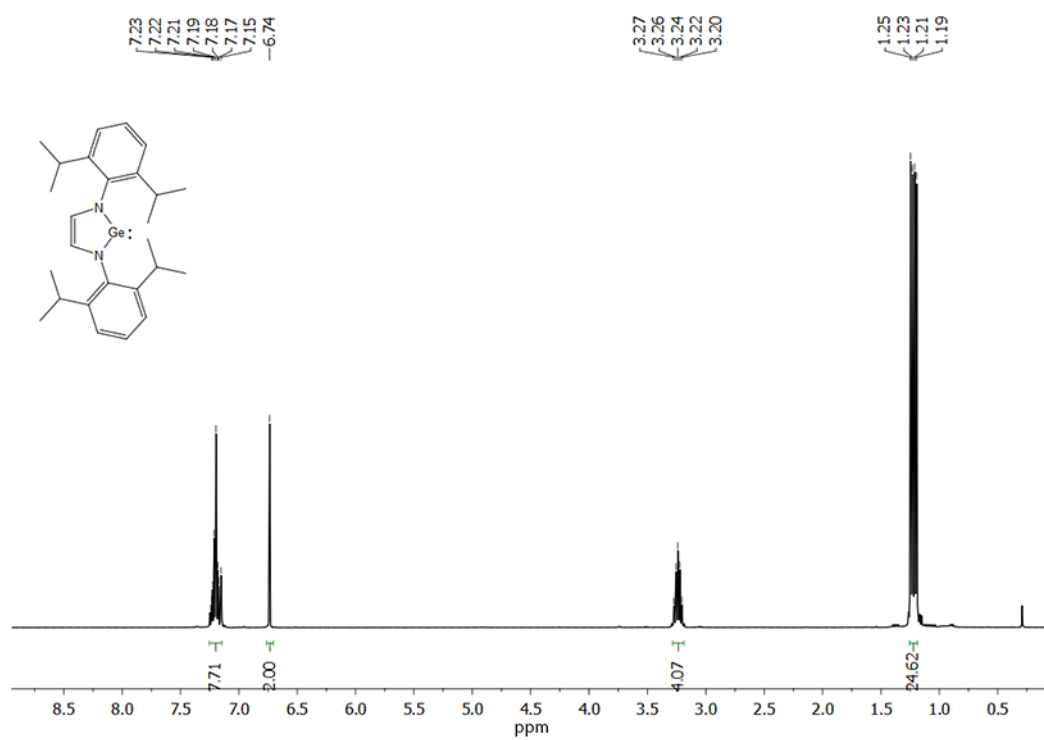

Figure S6. <sup>1</sup>H NMR

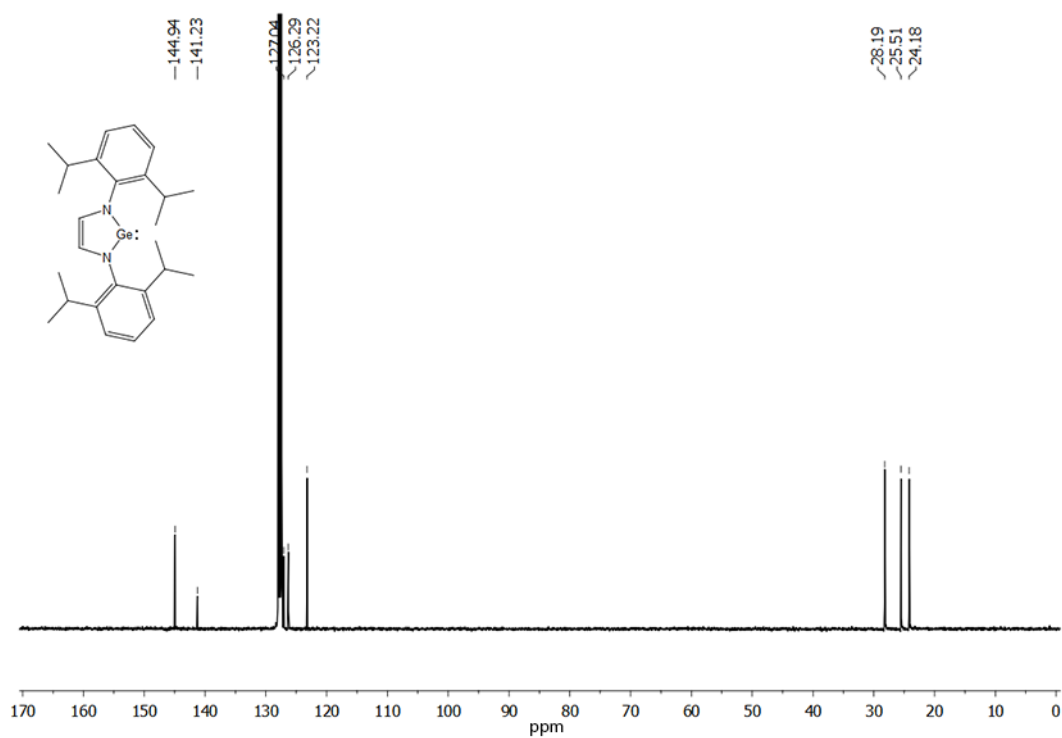

Figure S7. <sup>13</sup>C NMR

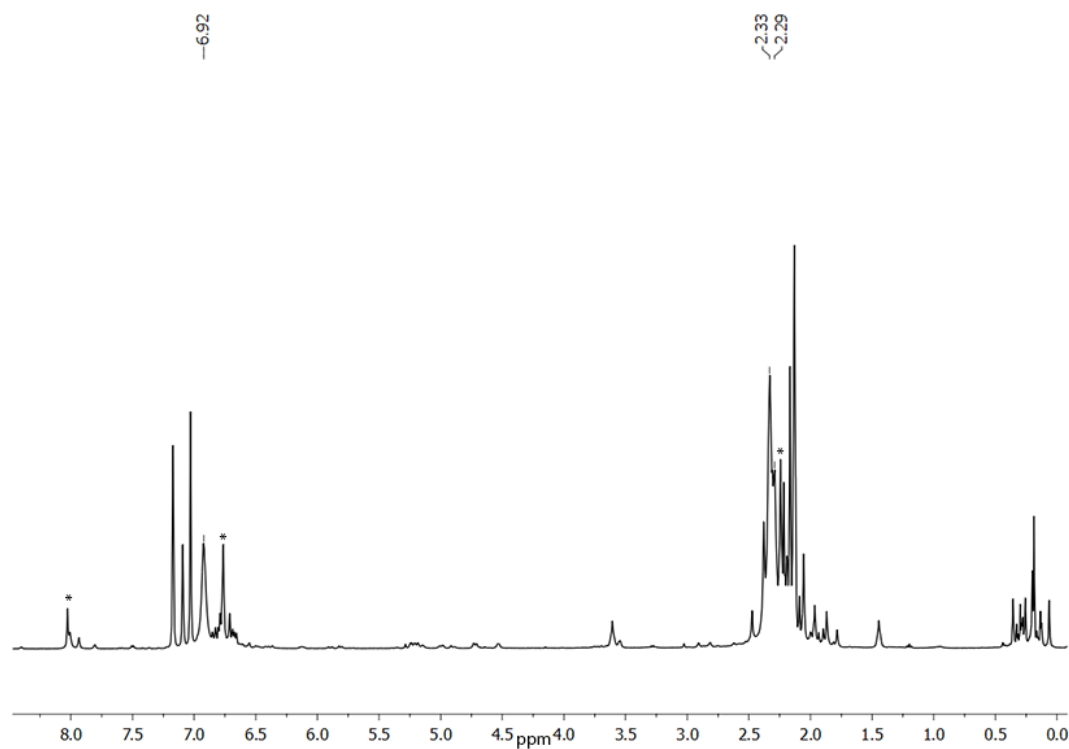

**Figure S8.**  $^1\text{H}$  NMR of Compound 2 (crude reaction mixture, before crystallization); \* = free ligand

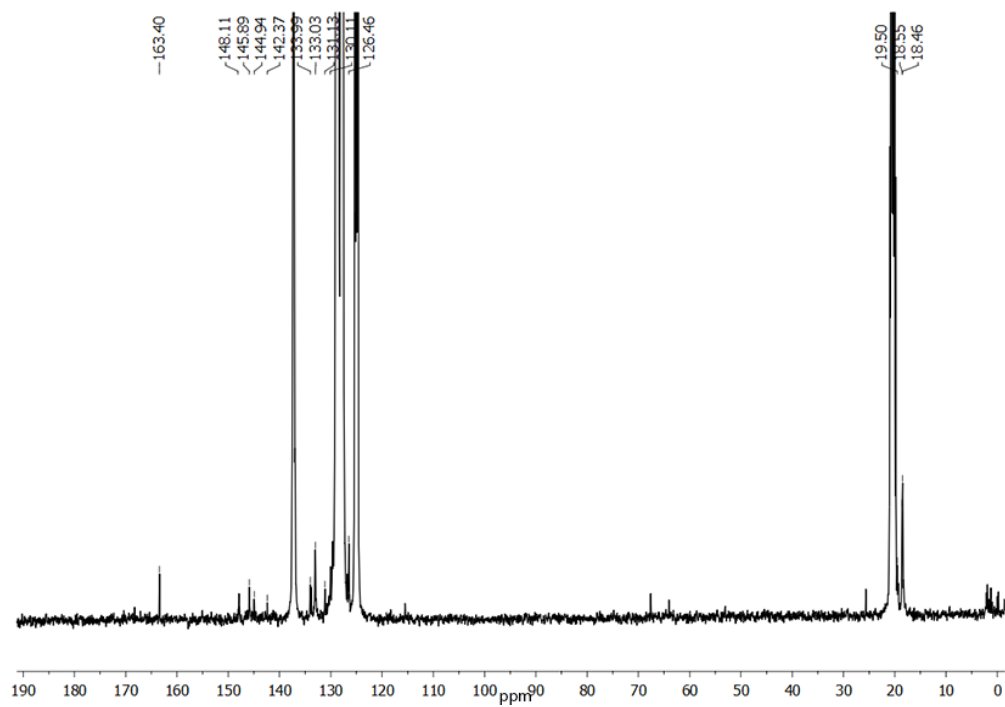

**Figure S9.**  $^{13}\text{C}$  NMR of Compound 2 (crude reaction mixture, before crystallization)

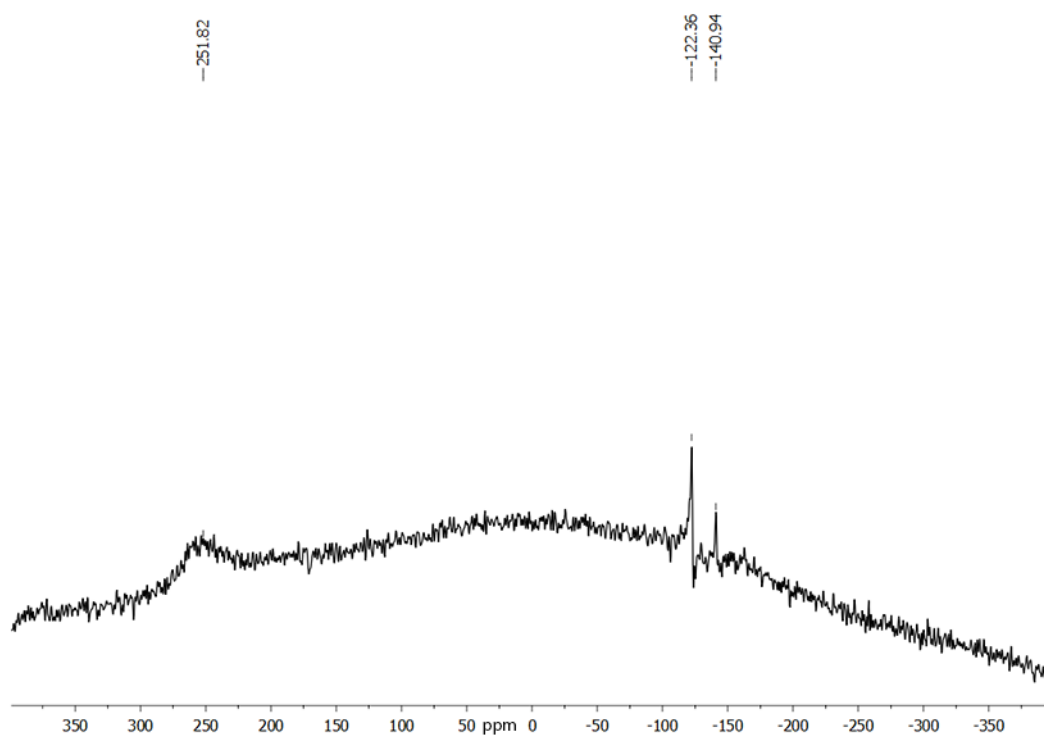

**Figure S10.**  $^{119}\text{Sn}$  NMR of Compound 2 (crude reaction mixture, before crystallization)

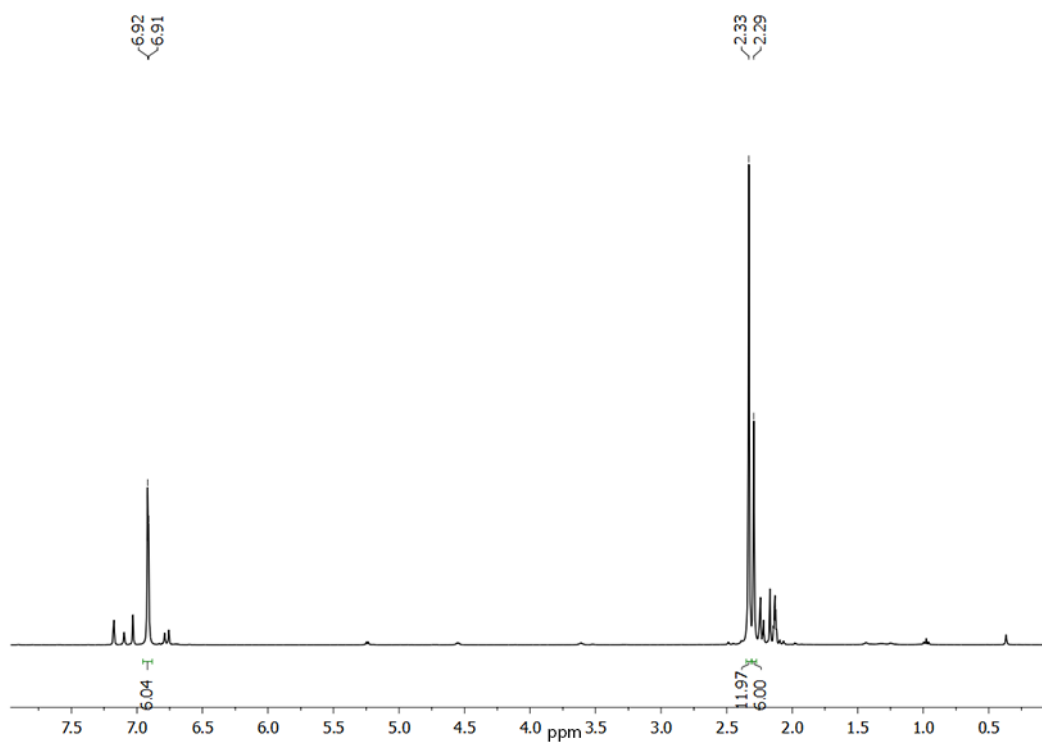

**Figure S11.**  $^1\text{H}$  NMR of Compound 2

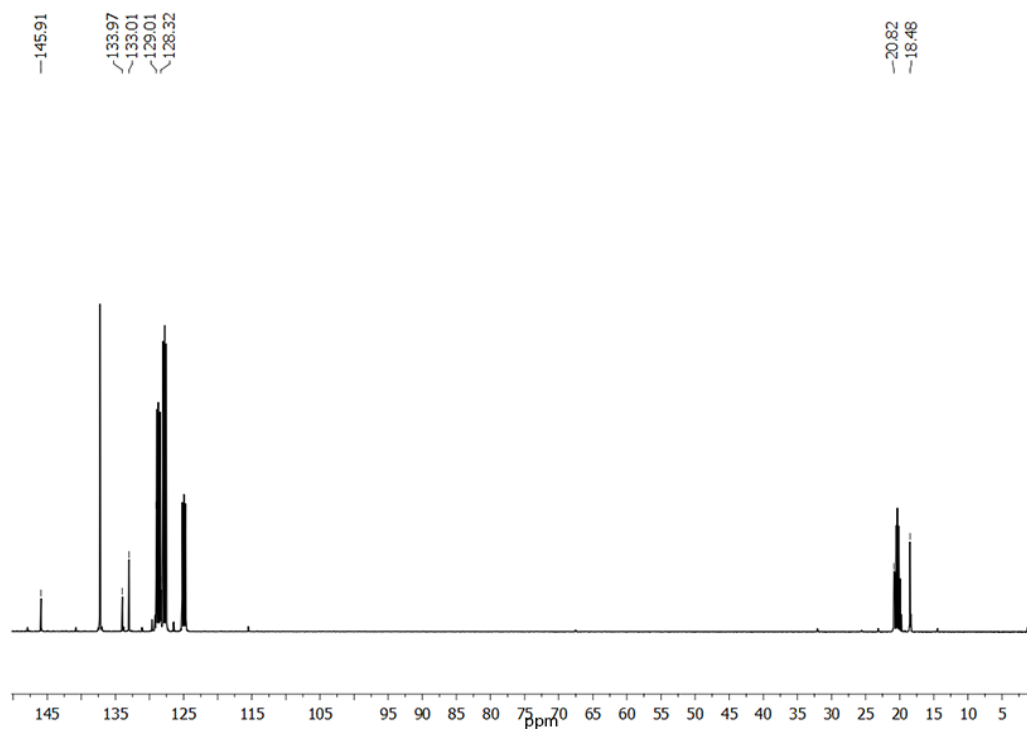

Figure S12.  $^{13}\text{C}$  NMR of Compound 2

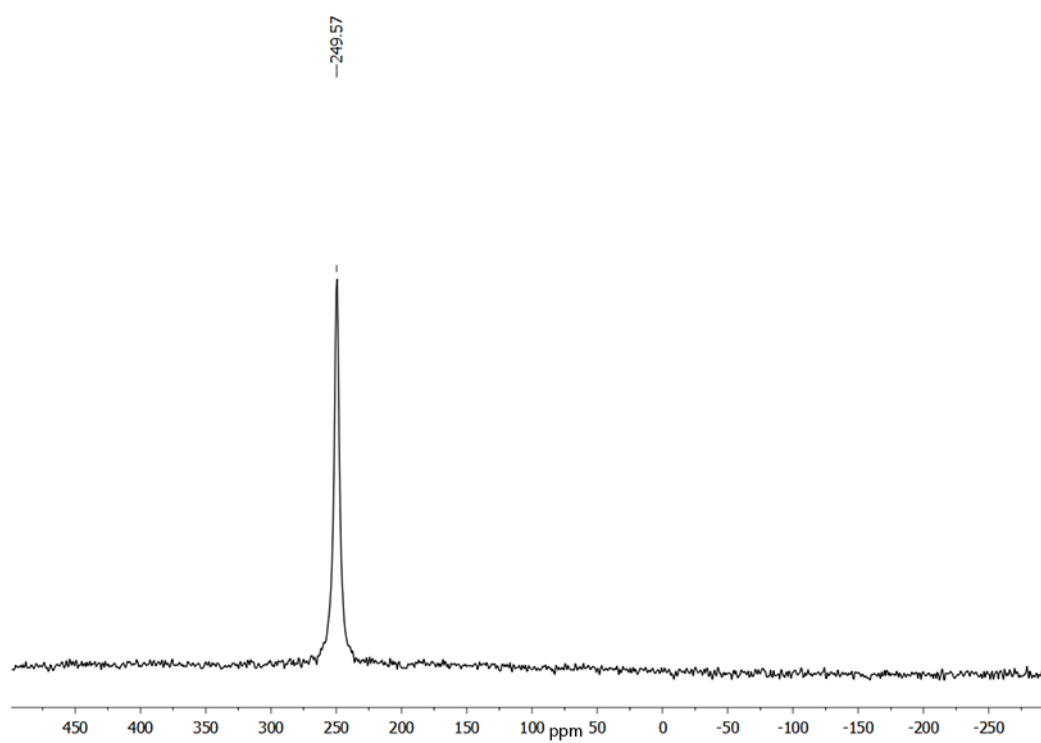

Figure S13.  $^{119}\text{Sn}$  NMR of Compound 2



## Attempts to synthesize *N*-Heterocyclic Silylene:

### Trial 1:

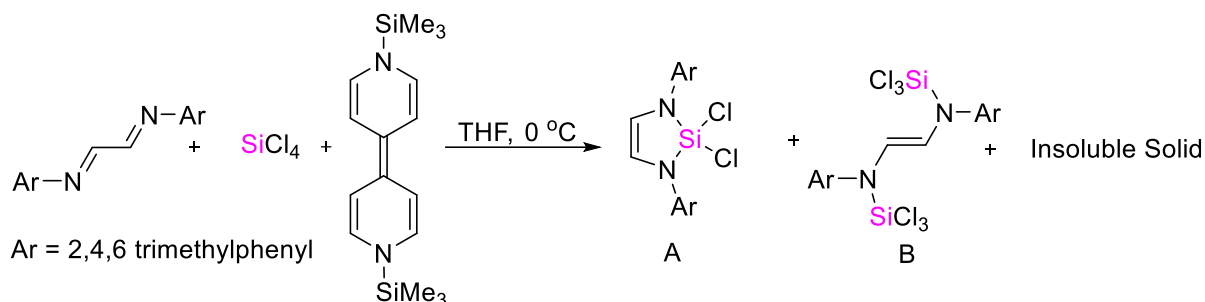

To a mixture of *N*<sup>1</sup>,*N*<sup>2</sup>-dimesitylethane-1,2-diimine (0.254 g, 0.865 mmol) and 1,1'-bis(trimethylsilyl)-1,1'-dihydro-4,4'-bipyridine (0.528 g, 1.74 mmol) taken in 20 mL of tetrahydrofuran maintained at 0 °C, was added drop-wise 5 mL tetrahydrofuran solution of SiCl<sub>4</sub> (0.1 mL, 0.865 mmol). The red reaction mixture was warmed to room temperature and stirred for 12 hours. The volatiles were removed under vacuum giving a brown solid. Hexane was added to it and filtered. Subsequently, the filtrate was evaporated under vacuum giving orange sticky solid.

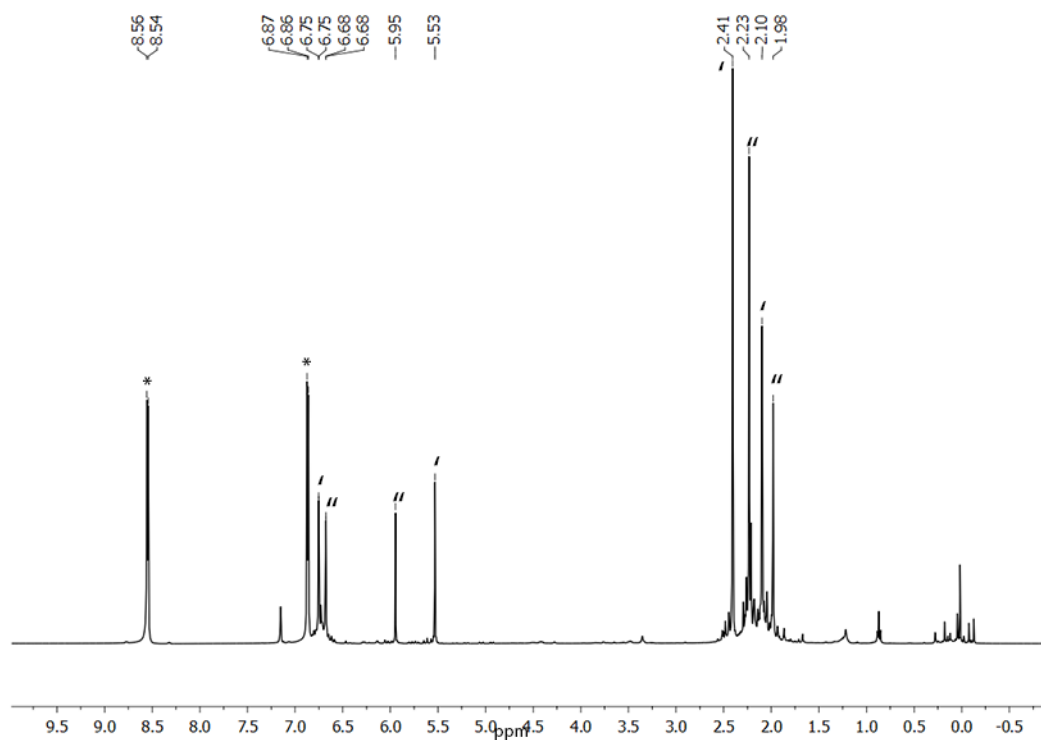

**Figure S14.** <sup>1</sup>H NMR plot of Trial 1 (\* = 4,4'-Bipyridine, ' = A, '' = B)

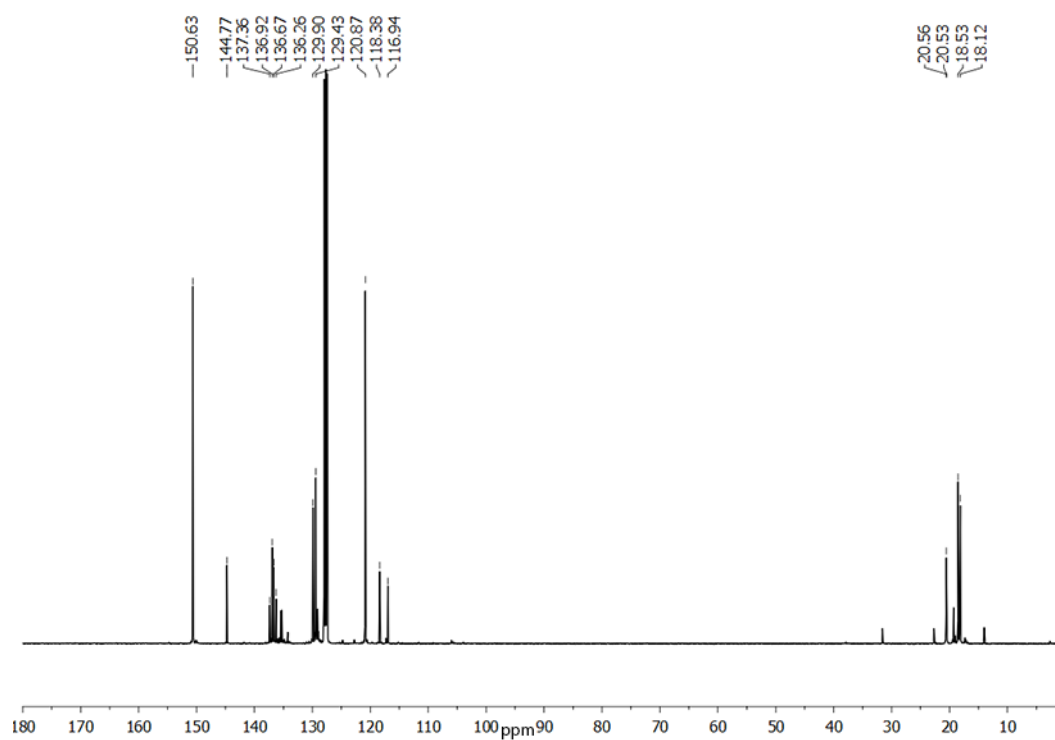

**Figure S15.**  $^{13}\text{C}$  NMR Plot of Trial 1

### Trial 2:

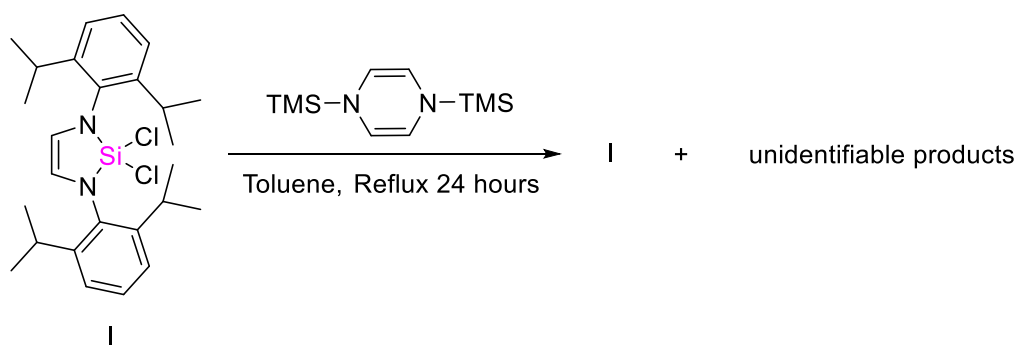

20 mL of toluene was added to mixture of 2,2-dichloro-1,3-bis(2,6-diisopropylphenyl)-2,3-dihydro-1H-1,3,2-diazasilole [S1] (0.3 g, 0.631 mmol) and 1,4-bis(trimethylsilyl)-1,4-dihydropyrazine (0.142 g, 0.631 mmol) at room temperature. The yellow reaction mixture was refluxed for 24 hours. Volatiles were removed under vacuum giving yellow viscous liquid.

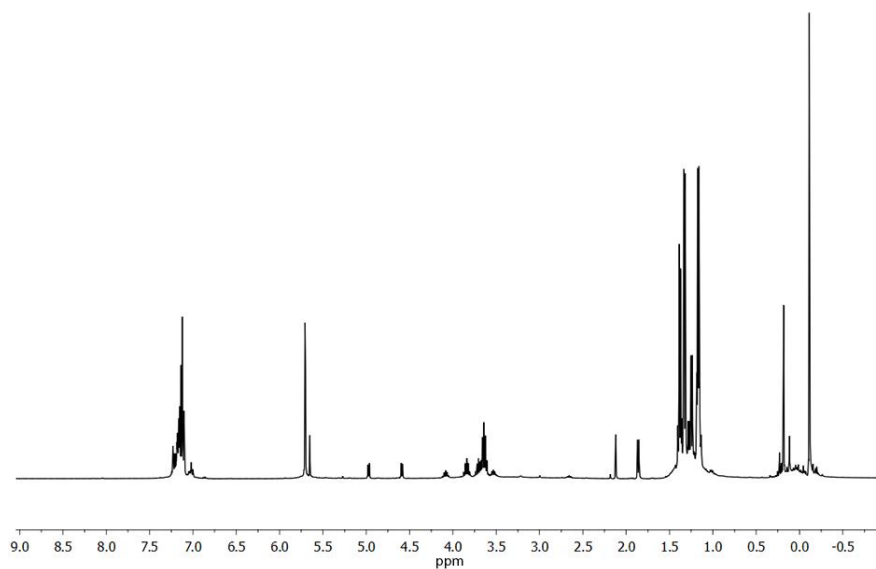

Figure S16.  $^1\text{H}$  NMR of Trial 2

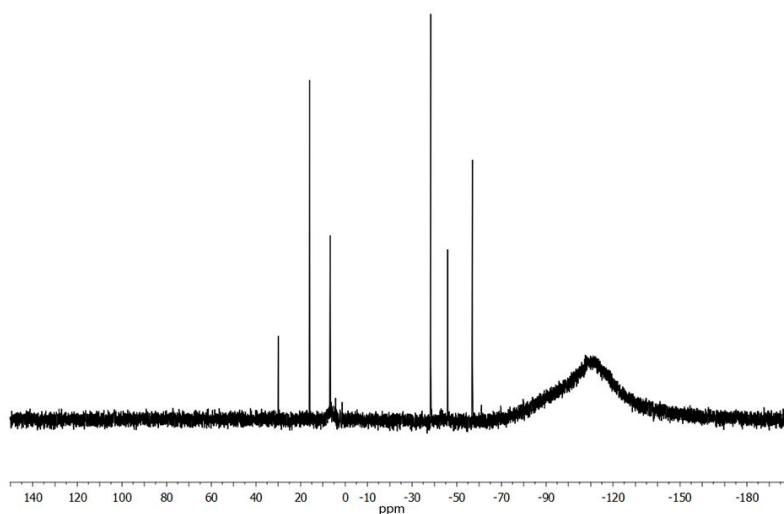

Figure S17.  $^{29}\text{Si}$  NMR of Trial 2

### Trial 3:

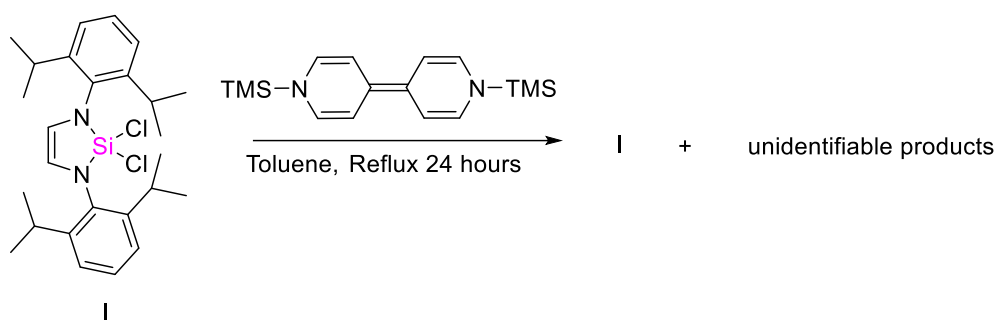

20 mL of toluene was added to mixture of 2,2-dichloro-1,3-bis(2,6-diisopropylphenyl)-2,3-dihydro-1H-1,3,2-diazasilole (0.3 g, 0.631 mmol) and 1,1'-bis(trimethylsilyl)-1H,1'H-4,4'-bipyridinyldiene (0.191 g, 0.631 mmol) at room temperature. The orange reaction mixture was refluxed for 24 hours. Volatiles were removed under vacuum giving orange yellow viscous liquid.

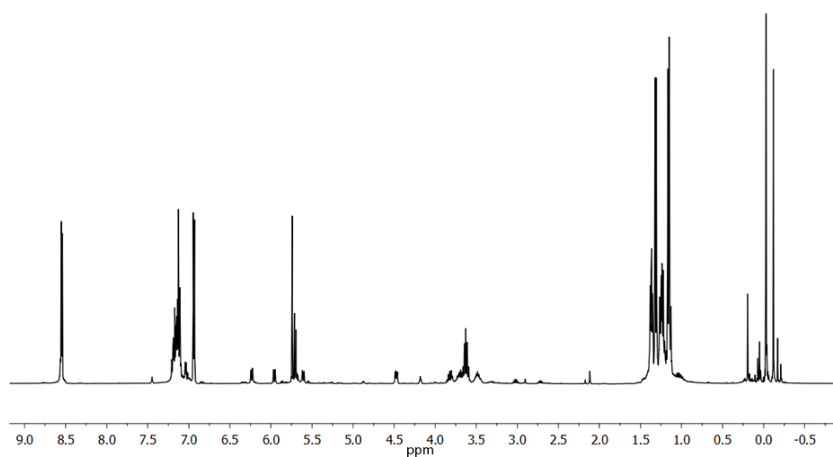

Figure S18. <sup>1</sup>H NMR of Trial 3

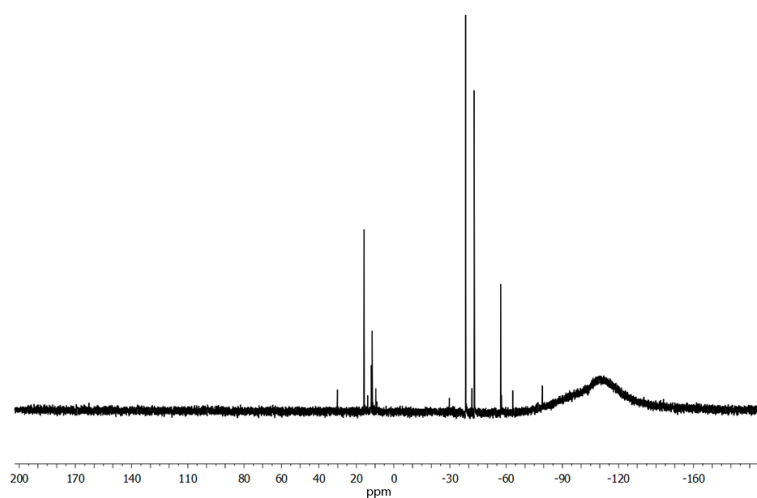

Figure S19. <sup>29</sup>Si NMR of Trial 3

#### Trial 4:

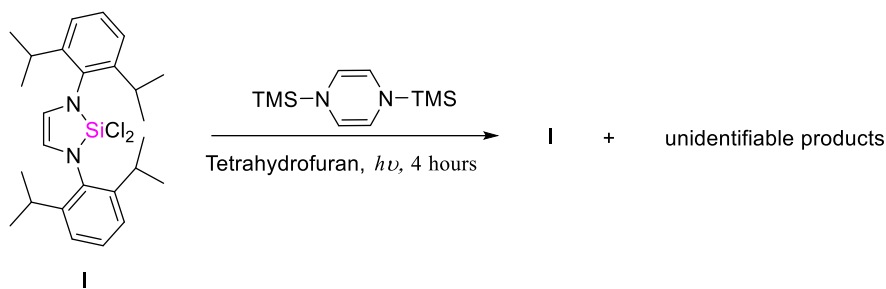

Photochemical reactor was charged with 70 mL tetrahydrofuran solution of 2,2-dichloro-1,3-bis(2,6-diisopropylphenyl)-2,3-dihydro-1H-1,3,2-diazasilole (0.238 g, 0.5 mmol) and 1,4-bis(trimethylsilyl)-1,4-dihydropyrazine (0.113 g, 0.5 mmol). The yellow reaction mixture was irradiated with ultraviolet light for 4 hours. The volatiles were removed under vacuum giving yellow viscous liquid.

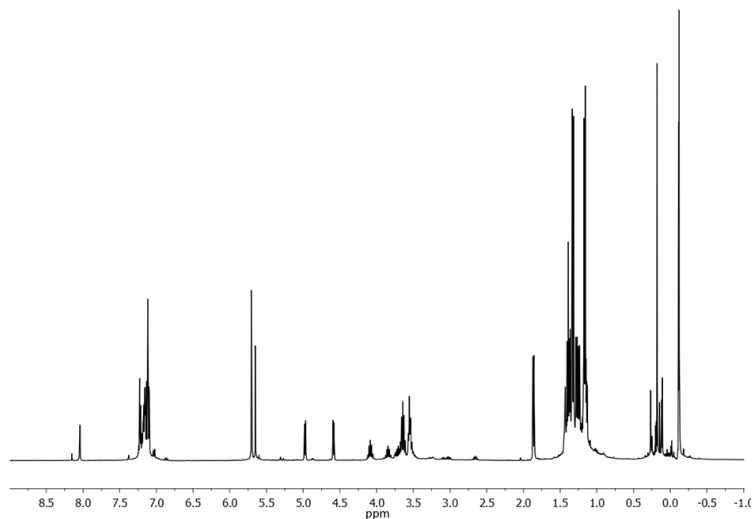

Figure S20. <sup>1</sup>H NMR

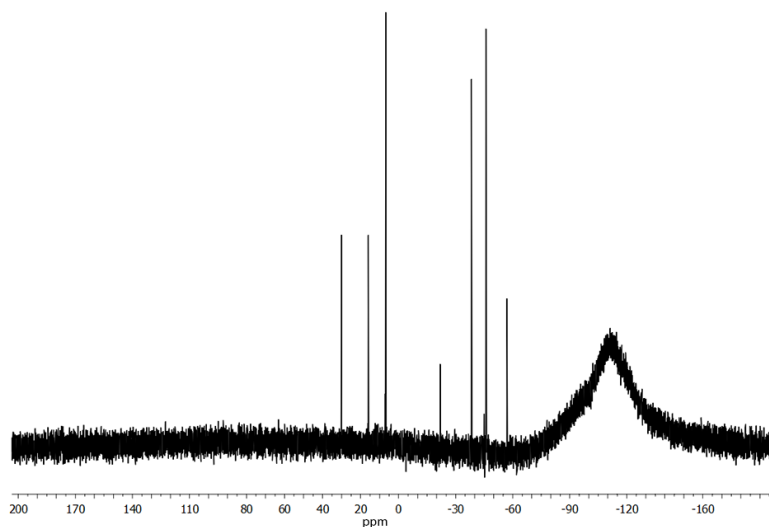

Figure S21. <sup>29</sup>Si NMR

### Reaction of Diazabutadiene with Organosilicon Reductant

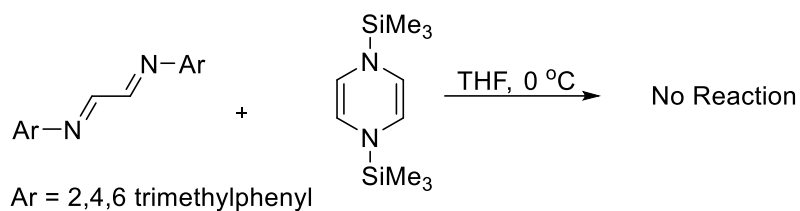

10 mL of tetrahydrofuran was added to a mixture of N<sup>1</sup>,N<sup>2</sup>-dimesitylethane-1,2-diimine (0.1 g, 0.342 mmol) and 1,4-bis(trimethylsilyl)-1,4-dihydropyrazine (0.077g, 0.342 mmol) at room temperature. The yellow reaction mixture was stirred for 12 hours at room temperature. Solvent was removed under vacuum giving yellow solid.

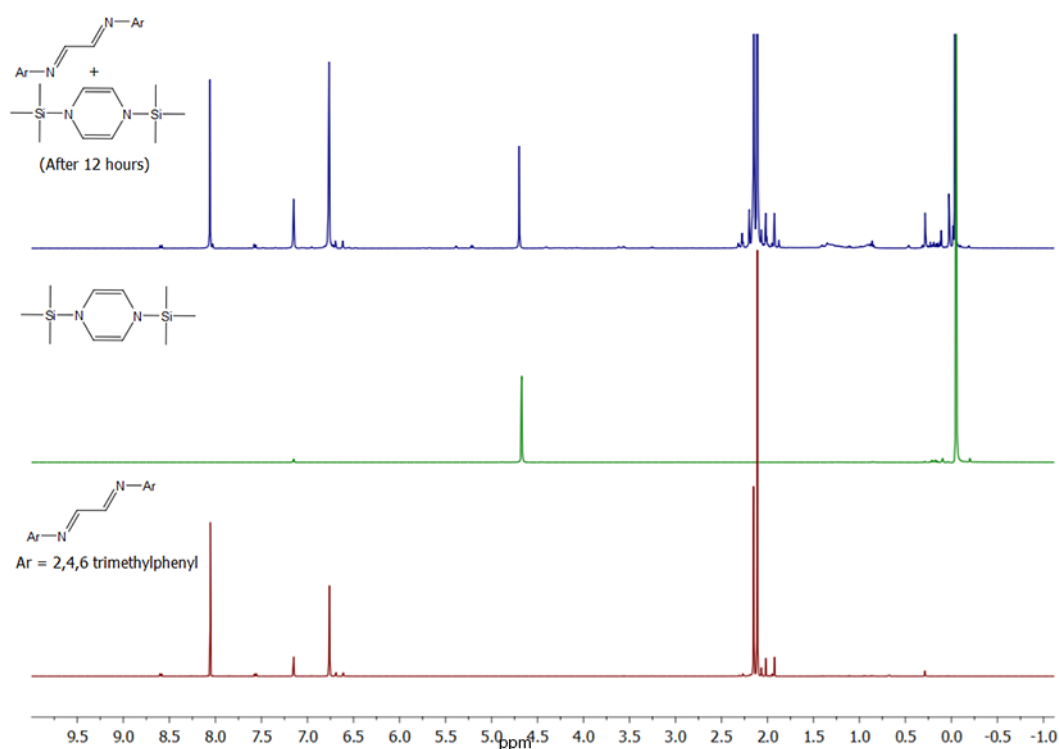

**Figure S22.** <sup>1</sup>H NMR study for the reaction between diazabutadiene and organosilicon reductant.

## 2. X-ray Data

**Table S1. Crystal data and structure refinement for Compound 1.**

|                                   |                                                                                                               |
|-----------------------------------|---------------------------------------------------------------------------------------------------------------|
| Empirical formula                 | C <sub>20</sub> H <sub>24</sub> N <sub>2</sub> Ge                                                             |
| Formula weight                    | 365.00                                                                                                        |
| Temperature                       | 100 K                                                                                                         |
| Wavelength                        | 1.54178 Å                                                                                                     |
| Crystal system                    | Triclinic                                                                                                     |
| Space group                       | P -1                                                                                                          |
| Unit cell dimensions              | a = 8.1542 (4) Å   α = 76.988 (2)<br>b = 10.2525 (4) Å   β = 75.233 (2)<br>c = 12.5214 (6) Å   γ = 67.180 (2) |
| Volume                            | 923.58 (7) Å <sup>3</sup>                                                                                     |
| Z                                 | 2                                                                                                             |
| Density (calculated)              | 1.312 g/cm <sup>3</sup>                                                                                       |
| Absorption coefficient            | 2.241 mm <sup>-1</sup>                                                                                        |
| F(000)                            | 380                                                                                                           |
| Crystal size                      | 0.09 x 0.08 x 0.07 cm <sup>3</sup>                                                                            |
| Theta range for data collection   | 4.727 to 66.731°.                                                                                             |
| Index ranges                      | -9<=h<=9, -12<=k<=12, -14<=l<=14                                                                              |
| Reflections collected             | 5992                                                                                                          |
| Independent reflections           | 3188 [R(int) = 0.0371]                                                                                        |
| Completeness to theta = 66.731°   | 97.3 %                                                                                                        |
| Absorption correction             | Multi-scan                                                                                                    |
| Max. and min. transmission        | 0.817 and 0.855                                                                                               |
| Refinement method                 | Full-matrix least-squares on F <sup>2</sup>                                                                   |
| Data / restraints / parameters    | 3188 / 0 / 214                                                                                                |
| Goodness-of-fit on F <sup>2</sup> | 1.088                                                                                                         |
| Final R indices [I>2sigma(I)]     | R1 = 0.0359, wR2 = 0.0969                                                                                     |
| R indices (all data)              | R1 = 0.0371, wR2 = 0.0979                                                                                     |
| Largest diff. peak and hole       | 0.629 and -0.404 e.Å <sup>-3</sup>                                                                            |

**Table S2. Crystal data and structure refinement for Compound 2**

|                                   |                                                   |
|-----------------------------------|---------------------------------------------------|
| Empirical formula                 | C <sub>20</sub> H <sub>24</sub> N <sub>2</sub> Sn |
| Formula weight                    | 411.10                                            |
| Temperature                       | 100 K                                             |
| Wavelength                        | 1.54178 Å                                         |
| Crystal system                    | Triclinic                                         |
| Space group                       | P -1                                              |
| Unit cell dimensions              | a = 8.1203 (5) Å   α = 92.139 (2)                 |
|                                   | b = 10.3254 (6) Å   β = 104.427 (2)               |
|                                   | c = 12.4256 (7) Å   γ = 111.697 (2)               |
| Volume                            | 927.74 (10) Å <sup>3</sup>                        |
| Z                                 | 2                                                 |
| Density (calculated)              | 1.472 g/cm <sup>3</sup>                           |
| Absorption coefficient            | 10.943 mm <sup>-1</sup>                           |
| F(000)                            | 416                                               |
| Crystal size                      | 0.1 x 0.08 x 0.06 cm <sup>3</sup>                 |
| Theta range for data collection   | 3.712 to 66.644°.                                 |
| Index ranges                      | -9<=h<=9, -12<=k<=12, -14<=l<=14                  |
| Reflections collected             | 9456                                              |
| Independent reflections           | 3260 [R(int) = 0.0512]                            |
| Completeness to theta = 66.644°   | 99.2 %                                            |
| Absorption correction             | Multi-scan                                        |
| Max. and min. transmission        | 0.402 and 0.519                                   |
| Refinement method                 | Full-matrix least-squares on F <sup>2</sup>       |
| Data / restraints / parameters    | 3260 / 0 / 214                                    |
| Goodness-of-fit on F <sup>2</sup> | 1.132                                             |
| Final R indices [I>2sigma(I)]     | R1 = 0.0493, wR2 = 0.1215                         |
| R indices (all data)              | R1 = 0.0512, wR2 = 0.1234                         |
| Largest diff. peak and hole       | 2.874 and -2.247 e.Å <sup>-3</sup>                |



### 3. Molecular Structure

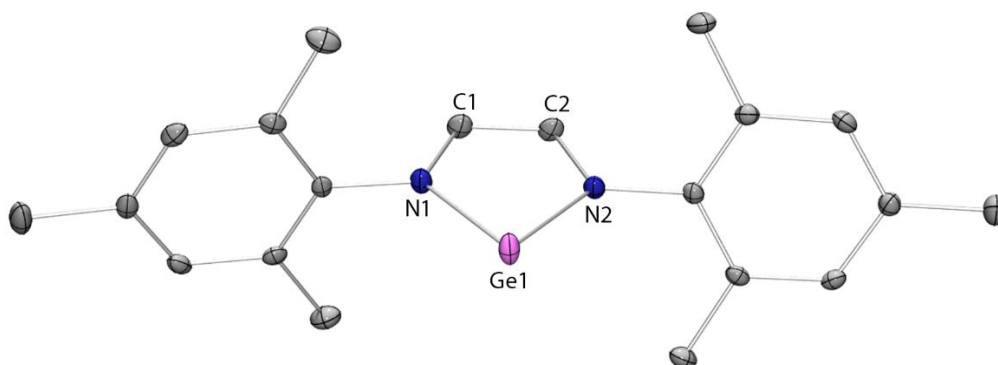

**Figure S23.** Molecular structure of **1** in the solid state (thermal ellipsoids at 30%, H atoms omitted for clarity). Selected bond lengths [Å] and bond angle [°]: Ge1-N1 = 1.8679 (18) Å, Ge1-N2 = 1.8786 (18); N1-Ge-N2 = 83.62 (8).

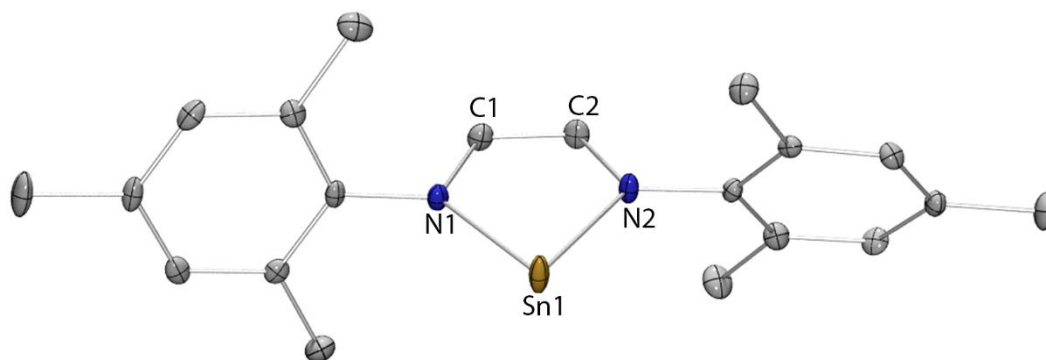

**Figure S24.** Molecular structure of **2** in the solid state (thermal ellipsoids at 30%, H atoms omitted for clarity). Selected bond lengths [Å] and bond angle [°]: Sn1-N1 = 2.089 (4) Å, Sn1-N2 = 2.096 (4); N1-Sn-N2 = 77.95 (16).

### References

[S1] Park, P.; Schäfer, A.; Mitra, A.; Haase, D.; Saak, W.; West, R.; Müller, T. Synthesis and reactivity of *N*-aryl substituted *N*-heterocyclic silylenes. *J. Organomet. Chem.* **2010**, 695, 398-408, DOI: 10.1016/j.jorganchem.2009.10.034.
